# Supplementary material for: Anterior-Posterior View by Full-Body Digital X-Ray to Rule Out Severe Spinal Injuries in Polytraumatized Patients
Source: Research Square preprint supplement (doi:10.21203/rs.3.rs-113716/v1), 2020-12-04
Supplement: Supplementary file 2 [file 1a9c1b95cf730256f4ddaa1d.docx]

**Anterior-Posterior View by Full-Body Digital X-Ray to Rule Out Severe Spinal Injuries in Polytraumatized Patients**

Original Research Article

*Sonja Häckel, MD, sonja.haeckel@insel.ch 1

*Elena Hofmann, MD elena.hofmann@rwth-aachen.de 1

Helen Anwander, MD helen.anwander@insel.ch 1

Christoph E. Albers, MD christoph.albers@insel.ch 1

Jasmin Basedow, MD, jasmin.basedow@lindenhofgruppe.ch 2

Sebastian F. Bigdon,MD sebastian.bigdon@insel.ch 1

Aristomenis K. Exadaktylos, MD, Prof aristomenis.exadaktylos@insel.ch 3

Marius J. B. Keel, MD, Prof., mkeel@traumazentrum.ch 4

Robert N. Dunn, MD, Prof., robert.dunn@uct.ac.za 5

Sithombo Maqungo, MD, Prof. sithombo@msn.com 5

Lorin M. Benneker, MD, Prof. lorin.benneker@insel.ch 1

Sven Hoppe, MD, sven.hoppe@insel.ch 1

*Sonja Häckel and Elena Hofmann contributed equally to this work

1 Department of Orthopaedic Surgery and Traumatology, Inselspital, Bern University Hospital, University of Bern, Freiburgstrasse 18, 3010 Bern, Switzerland.

2 Department of Radiology, Sonnenhof Hospital, Schänzlistrasse 39, 3013 Bern, Switzerland.

3 Emergency Department, Inselspital, Bern University Hospital, University of Bern, Freiburgstrasse 18, 3010 Bern, Switzerland.

4 Trauma Center Hirslanden, Klinik Hirslanden Zürich, Witellikerstrasse 40, 8032 Zürich, Switzerland.

5 Orthopaedic Research Unit, Department of Orthopaedic Surgery, Groote Schuur Hospital and Red Cross Children's Hospital, University of Cape Town, Klipfontein Rd, Rondebosch, Cape Town, 7700, South Africa.

Correspondence to: Sonja Häckel, Department of Orthopaedic and Trauma Surgery, Inselspital, Bern University Hospital, University of Bern, Freiburgstrasse 18, 3010 Bern, Switzerland. Phone +41 31 632 2222; Email to Sonja.haeckel@insel.ch

**Supplemental Material**

**Sample size calculation**

**Table 4a:** Sensitivity table, N=320. 95% Wilson confidence interval (%) varying the prevalence and the expected sensitivity.

|  | | Sensitivity | | | | | | |
| --- | --- | --- | --- | --- | --- | --- | --- | --- |
|  | | 0.4 | 0.45 | 0.5 | 0.55 | 0.6 | 0.65 | 0.7 |
| Prevalence | 0.15 | [27.7; 53.7] | [32.2; 58.5] | [36.8; 63.2] | [41.5; 67.8] | [46.3; 72.3] | [51.3; 76.6] | [56.4; 80.8] |
| 0.2 | [29.1; 52] | [33.7; 56.9] | [38.4; 61.6] | [43.1; 66.3] | [48; 70.9] | [53; 75.3] | [58.2; 79.6] |
| 0.25 | [30.2; 50.7] | [34.8; 55.6] | [39.5; 60.5] | [44.4; 65.2] | [49.3; 69.8] | [54.3; 74.3] | [59.5; 78.7] |
| 0.3 | [31; 49.8] | [35.7; 54.7] | [40.4; 59.6] | [45.3; 64.3] | [50.2; 69] | [55.3; 73.6] | [60.5; 78.1] |
| 0.35 | [31.6; 49] | [36.3; 54] | [41.1; 58.9] | [46; 63.7] | [51; 68.4] | [56; 73] | [61.2; 77.5] |
| 0.4 | [32.1; 48.5] | [36.8; 53.4] | [41.7; 58.3] | [46.6; 63.2] | [51.5; 67.9] | [56.6; 72.6] | [61.8; 77.1] |

**Table 4b:** Specificity table, N=320. 95% Wilson confidence interval (%) varying the prevalence and the expected specificity.

|  | | Specificity | | | |
| --- | --- | --- | --- | --- | --- |
|  | | 0.85 | 0.9 | 0.95 | 0.99 |
| Prevalence | 0.15 | [80.4; 88.7] | [86; 93] | [91.8; 97] | [97; 99.7] |
| 0.2 | [80.2; 88.8] | [85.8; 93] | [91.7; 97] | [96.9; 99.7] |
| 0.25 | [80.1; 88.9] | [85.7; 93.1] | [91.6; 97.1] | [96.8; 99.7] |
| 0.3 | [79.9; 89] | [85.5; 93.2] | [91.4; 97.1] | [96.7; 99.7] |
| 0.35 | [79.7; 89.1] | [85.3; 93.3] | [91.2; 97.2] | [96.6; 99.7] |
| 0.4 | [79.4; 89.3] | [85.1; 93.4] | [91.1; 97.3] | [96.4; 99.7] |
